# Supplementary material for: Fe3O4 nanopearl decorated carbon nanotubes stemming from carbon onions with self-cleaning and microwave absorption properties
Source: Royal Society of Chemistry journal article supplement (doi:10.1039/c5ra06042g), 2015-01-01
Supplement: c5ra06042g1.pdf [file c5ra06042g1.pdf]

## Supporting information

### **Fe<sub>3</sub>O<sub>4</sub> Nanoparticles Decorated Carbon Nanotubes Stemmed from Carbon Onions with Self-cleaning and Microwave Absorption Properties**

Xianyong Lu<sup>†\*</sup>, Yanzi Wu<sup>†‡</sup>, Hongyan Cai<sup>†‡</sup>, Xingyuan Qu<sup>†‡</sup>, Lingmei Ni<sup>†</sup>, Chao Teng<sup>†</sup>, Ying Zhu<sup>\*</sup>, Lei Jiang<sup>†‡</sup>

<sup>†</sup>Key Laboratory of Bio-Inspired Smart Interfacial Science and Technology of Ministry of Education, Beijing Key Laboratory of Bio-inspired Energy Materials and Devices, School of Chemistry and Environment, Beihang University, Beijing 100191, PR China

<sup>‡</sup>Institute of Chemistry, Chinese Academy of Sciences, Beijing 100190, P. R. China

---

\* To whom correspondence should be addressed: (X.Lu) xylu@buaa.edu.cn, (Y.Zhu) zhuying@buaa.edu.cn

‡ These authors contributed equally to this work.

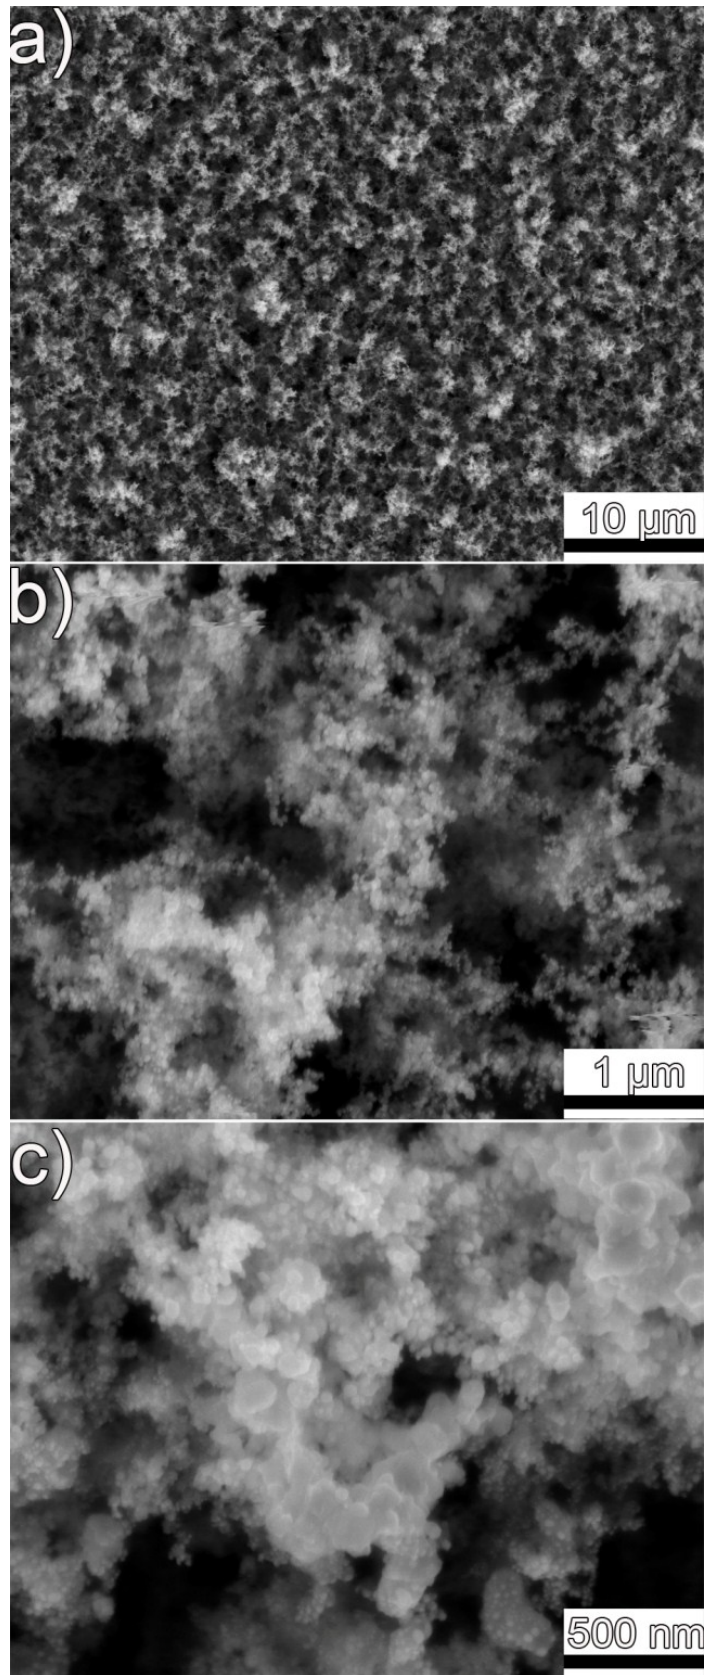

Fig. S1 SEM images of as-prepared nanocomposite film formed on pure copper foil via the flame strategy

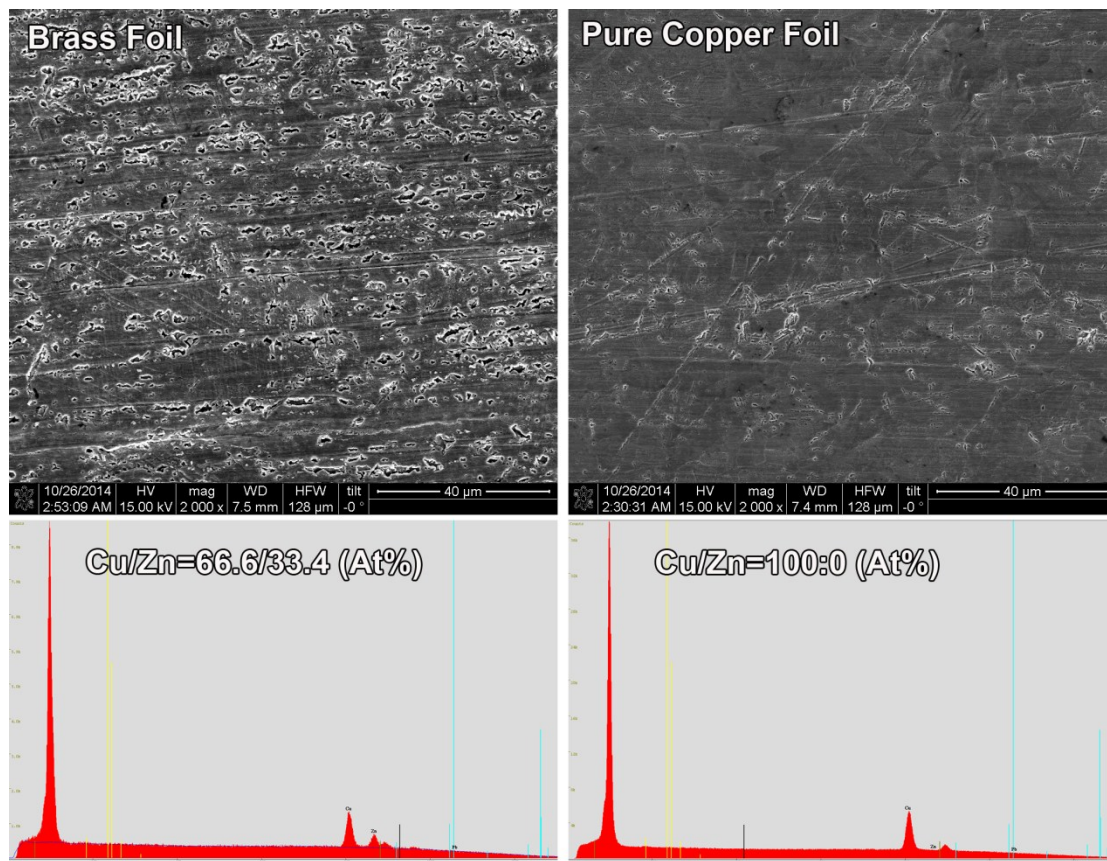

**Fig S2** SEM images and EDX spectra of brass foil (left) and pure copper foil (right)..

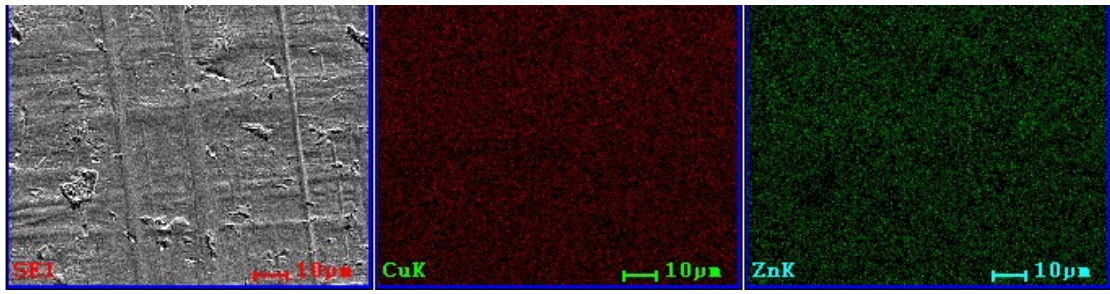

**Fig. S3** SEM image and the EDS element (CuK and ZnK) mapping images of brass foil

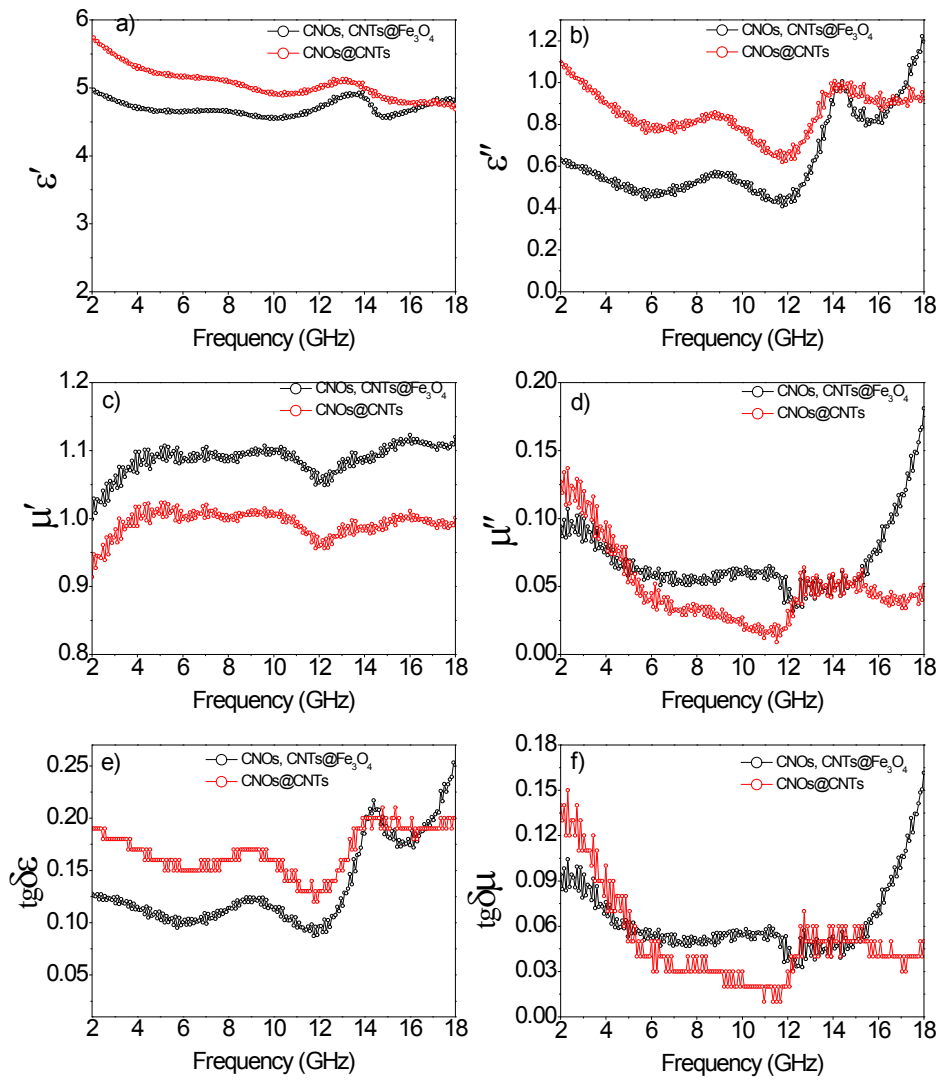

**Fig. 4s** Values of  $\epsilon'$  a),  $\epsilon''$  b),  $\mu'$  c),  $\mu''$  d),  $\tan \delta \epsilon$  e) and  $\tan \delta \mu$  f) for CNOs/CNTs@Fe<sub>3</sub>O<sub>4</sub>, CNOs/CNTs .
